# Supplementary material for: <strong>Spatial Assessment of Potential Conflict of Sun Bear- Human Based on Landscape Ecology in Pasaman</strong>
Source: Preprints.org preprint supplement (doi:10.20944/preprints202008.0498.v1), 2020-08-24
Supplement: Supplementary file 1 [file supplementary]

## Author Statement of Ethics

Hereby I declare

Name : Muhammad Hanif :  
Article Title : Spatial Assessment of Potential Conflict of Sun Bear- Human Based on  
Landscape Ecology in Pasaman  
Handphone : 085210504212  
Email : hanif12mphy@gmail.com  
Office Address : Jln. Hamka Air Tawar Barat, Padang City  
Author Contribution : I am correspondence author and main researcher setting the  
methodology, interpreted of data and evaluation draft.

Stated that

1. The article is belonging author and not plagiat form other article
2. he author is responsible for the publication of the accompanying article
3. The article has not yet been published, is not currently being considered for publication by any other journal and will not be submitted for such review while under review:
4. The novelty and innovation from this article is copyright on researcher
5. The work described in the manuscript is our own and our individual contribution to this work is significant enough to qualify for authorship/we also agree to the authorship of the article.

Padang 21 . 08 . 2020



Muhammad Hanif
